# Supplementary material for: Epigenetic regulation of HGK/MAP4K4 in T cells of type 2 diabetes patients
Source: PubMed Central journal article supplement (PMC4905452; doi:10.18632/oncotarget.7686), 2016-02-24
Supplement: oncotarget-07-10976-s001.pdf [file oncotarget-07-10976-s001.pdf]

## **Epigenetic regulation of HGK/MAP4K4 in T cells of type 2 diabetes patients**

### **Supplementary Information**

## **Table of contents**

|                                                                                                                                                      |         |
|------------------------------------------------------------------------------------------------------------------------------------------------------|---------|
| Supplementary Figure 1<br>The analysis plan of clinical samples.                                                                                     | Page 3  |
| Supplementary Figure 2<br>Plasma levels of IL-6 and IL-17 are significantly increased in peripheral blood of IGT and T2D patients.                   | Page 4  |
| Supplementary Figure 3<br>IL-6-producing T cells in type 2 diabetes patients are also IL-17-positive T cells.                                        | Page 5  |
| Supplementary Figure 4<br>IL-17 levels secreted from human peripheral blood T cells are not induced by HGK shRNA.                                    | Page 6  |
| Supplementary Figure 5<br>Enhancement of HGK mRNA levels is concomitant with reduction of IL-6 mRNA levels in T cells after demethylation treatment. | Page 7  |
| Supplementary Table 1<br>Clinical characteristics of overall population and the subgroup in this study.                                              | Page 8  |
| Supplementary Table 2<br>Association of the HGK methylation frequencies with clinical parameters.                                                    | Page 9  |
| Supplementary Table 3<br>Multivariate linear regression analyses for the estimated risk of high OGTT glucose levels.                                 | Page 11 |

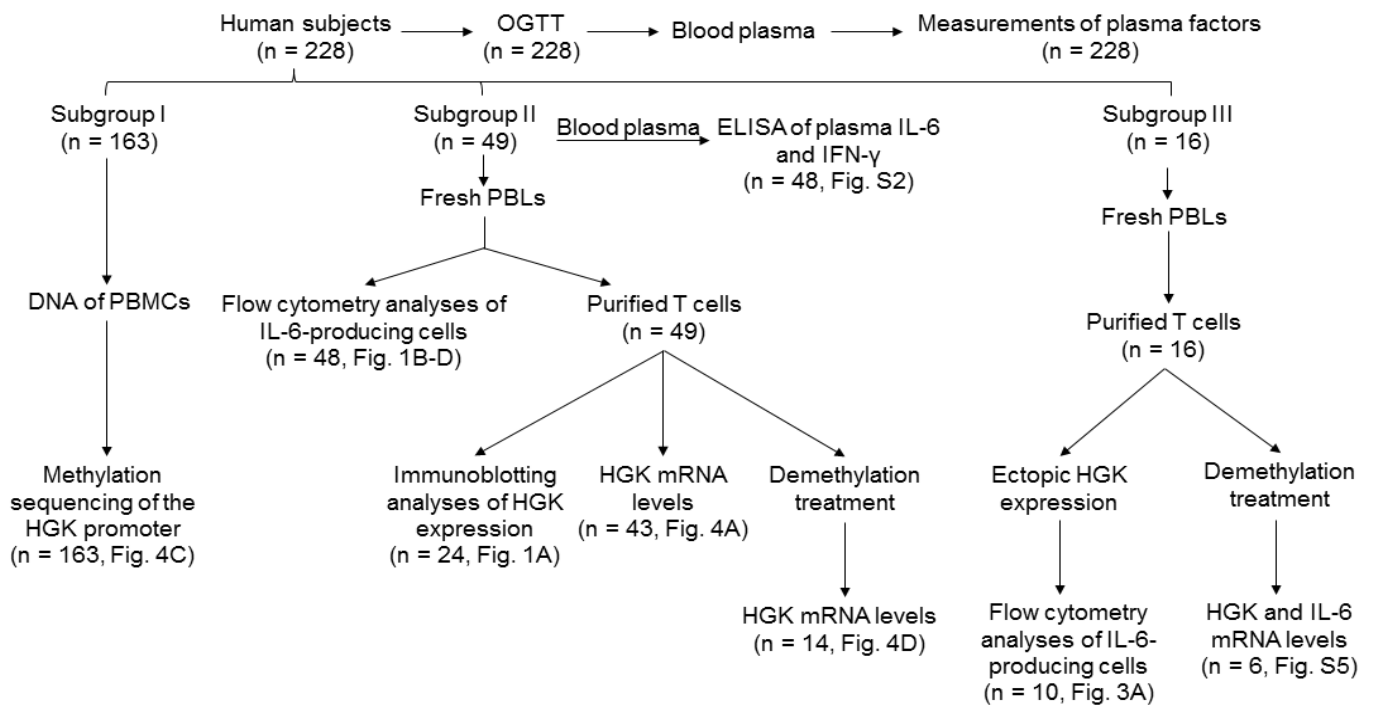

**Figure S1. The analysis plan of clinical samples.** OGTT, oral glucose tolerance test; PBMC, peripheral blood mononuclear cell; PBL, peripheral blood leukocytes. Plasma factors included insulin, glucose, triglyceride, glycosylated hemoglobin, and low-density lipoprotein.

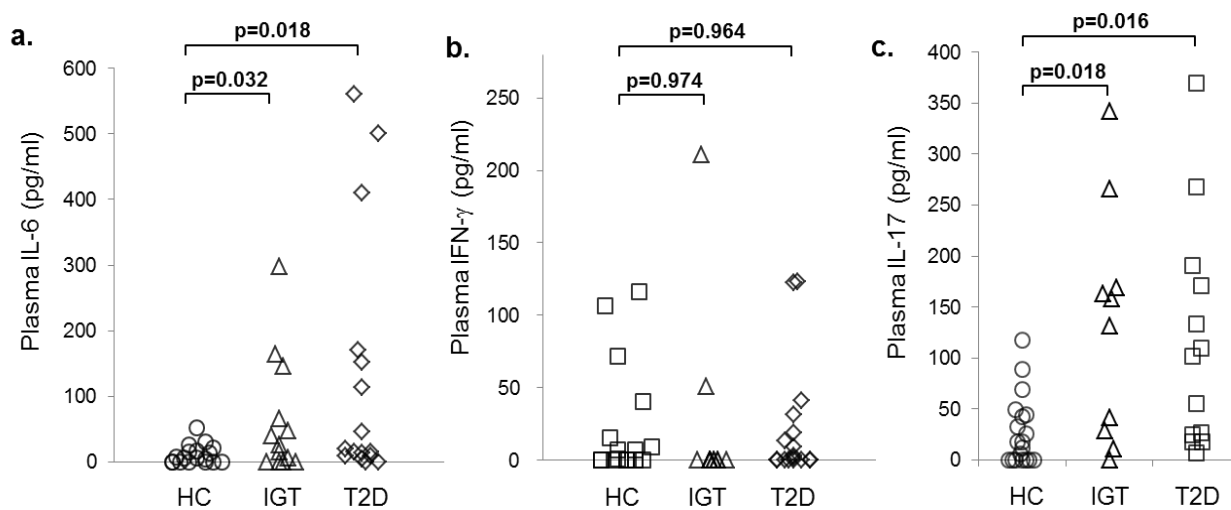

**Figure S2. Plasma levels of IL-6 and IL-17 are significantly increased in peripheral blood of IGT and T2D patients.** Indicated cytokine levels in the plasma of impaired glucose tolerance (IGT) patients, type 2 diabetic (T2D) patients, and healthy controls (HC) were determined by ELISA assays.

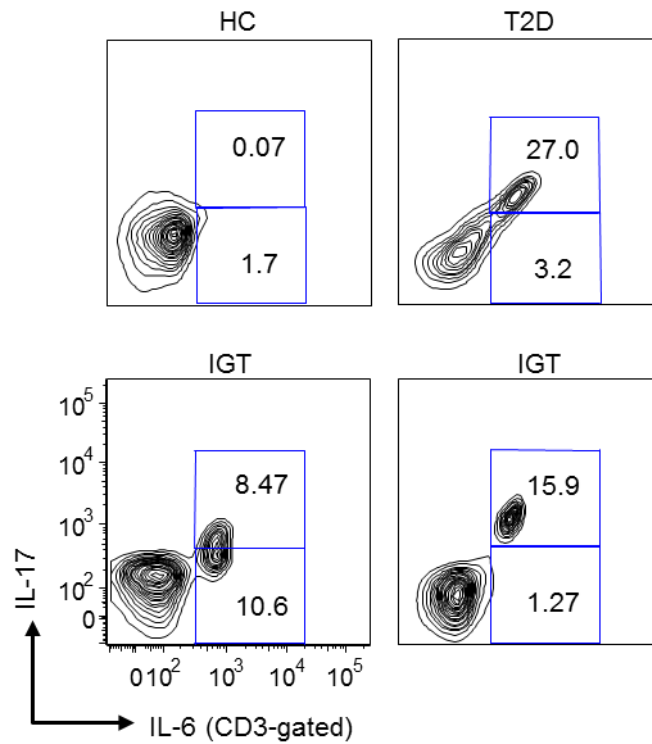

**Figure S3. IL-6-producing T cells in type 2 diabetes patients are also IL-17-positive T cells.** Flow cytometry analyses of IL-6-producing CD3<sup>+</sup> T cells (CD3-gated) and IL-17A-producing T cells from peripheral blood of 13 healthy controls (HC), 13 impaired glucose tolerance (IGT), and 18 type 2 diabetes (T2D) patients; representative results from one HC, two IGT, and one T2D subjects are shown.

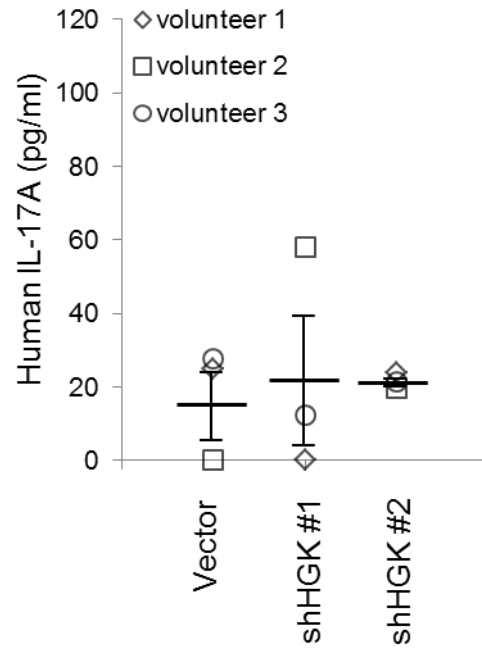

**Figure S4. IL-17 levels secreted from human peripheral blood T cells are not induced by HGK shRNA.** Peripheral blood T cells isolated from 3 volunteers were transfected with a control vector (pSuper) or HGK shRNA plasmids (shHGK #1 or shHGK #2). The IL-17 levels in the supernatants of the transfected but unstimulated T cells were determined by ELISA. Data are presented as mean  $\pm$  SEM.

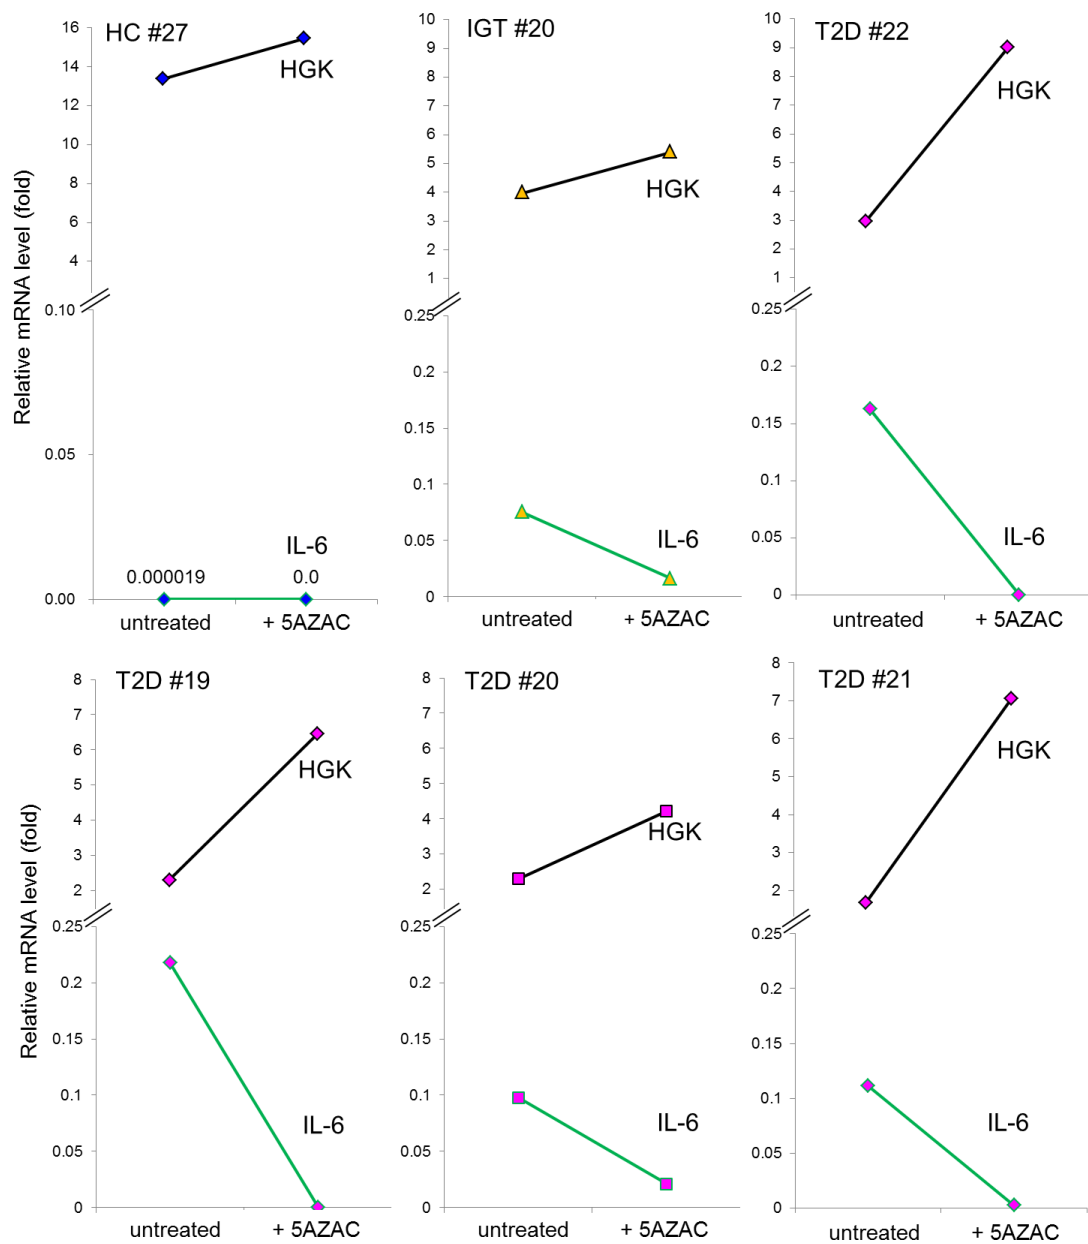

**Figure S5. Enhancement of HGK mRNA levels is concomitant with reduction of IL-6 mRNA levels in T cells after demethylation treatment.** Relative HGK and IL-6 mRNA levels in T cells from healthy control, IGT, and T2D patients before and after treatment with the methyltransferase inhibitor 5-azacytidine (5-AZAC; 4  $\mu$ M) for 72 hours. HGK and IL-6 mRNA levels were measured by quantitative real-time PCR.

## Appendix Tables

|                                | Subgroup I   |               | Subgroup II  |               |               |
|--------------------------------|--------------|---------------|--------------|---------------|---------------|
|                                | NGT/HC       | T2D           | NGT/HC       | IGT           | T2D           |
| <b>Number</b>                  | 49           | 114           | 18           | 13            | 18            |
| <b>Age (year)</b>              | 61.0 ± 14.5  | 64.2 ± 12.5   | 55.0 ± 9.6   | 59.8 ± 13.5   | 64.6 ± 15.2   |
| <b>Sex (female/male)</b>       | 16/33        | 17/97         | 2/16         | 3/10          | 3/15          |
| <b>Weight (kg)</b>             | 63.4 ± 11.4  | 70.1 ± 10.3   | 67.6 ± 10.5  | 69.2 ± 9.4    | 69.0 ± 10.3   |
| <b>BMI (kg/m<sup>2</sup>)</b>  | 24.7 ± 3.2   | 25.9 ± 3.4#   | 24.0 ± 3.1   | 26.6 ± 2.8*   | 25.1 ± 2.9    |
| <b>Waist (cm)</b>              | 86.7 ± 9.3   | 91.9 ± 8.7    | 84.3 ± 9.3   | 91.5 ± 7.5    | 90.1 ± 7.8    |
| <b>FPG (mg/dl)</b>             | 86.8 ± 7.5   | 114.7 ± 27.9# | 88.9 ± 7.0   | 98.7 ± 6.1*   | 111.6 ± 14.9# |
| <b>2h PG (mg/dl)</b>           | 101.8 ± 22.3 | 230.7 ± 27.9# | 104.6 ± 22.1 | 164.1 ± 10.7* | 238.5 ± 41.3# |
| <b>HbA1C</b>                   | 5.8 ± 0.4    | 6.6 ± 0.95    | 6.1 ± 0.4    | 6.2 ± 0.4     | 6.6 ± 0.84    |
| <b>TG</b>                      | 148.2 ± 87.4 | 162.9 ± 94.9  | 136.8 ± 44.3 | 153.8 ± 108.7 | 155.8 ± 80.3  |
| <b>Fasting insulin (μU/ml)</b> | 8.5 ± 6.0    | 10.8 ± 7.5    | 8.1 ± 6.3    | 9.9 ± 3.6     | 9.7 ± 5.5     |

**Table S1. Clinical characteristics of the Subgroup I and Subgroup II in this study.**

Human subjects were classified based on the results of oral GTT (OGTT). Individuals with normal glucose tolerance (NGT) were used as health controls (HC). Patients with impaired glucose tolerance (IGT) were classified as prediabetic. Plus–minus values were means ± SD. \*, *P* value <0.05 (comparing IGT group with HC group); #, *P* value <0.05 (comparing T2D group with HC and IGT group). BMI, body mass index. FPG, fasting plasma glucose. 2h PG, plasma glucose levels after 2h OGTT. HbA1C, glycosylated hemoglobin levels. TG, triglyceride levels. Waist, waist circumference.



| <b>Pearson correlation coefficient (P value)</b> | <b>Age</b>        | <b>Sex</b>         | <b>BMI</b>        | <b>Smoking</b>     | <b>LDL</b>        | <b>OGTT Glucose</b> | <b>HbA1C</b>        |
|--------------------------------------------------|-------------------|--------------------|-------------------|--------------------|-------------------|---------------------|---------------------|
| Pos. 1                                           | 0.028<br>(0.721)  | -0.133<br>(0.091)  | 0.155*<br>(0.049) | 0.049<br>(0.534)   | -0.159<br>(0.156) | 0.562***<br>(0.000) | 0.311***<br>(0.000) |
| Pos. 2                                           | 0.054<br>(0.494)  | -0.149<br>(0.058)  | 0.169*<br>(0.031) | 0.071<br>(0.369)   | -0.025<br>(0.749) | 0.688***<br>(0.000) | 0.290***<br>(0.000) |
| Pos. 3                                           | -0.009<br>(0.913) | -0.173*<br>(0.027) | 0.184*<br>(0.019) | 0.066<br>(0.405)   | -0.017<br>(0.832) | 0.600***<br>(0.000) | 0.248**<br>(0.001)  |
| Pos. 4                                           | 0.013<br>(0.865)  | -0.170*<br>(0.030) | 0.188*<br>(0.016) | 0.114<br>(0.148)   | -0.059<br>(0.455) | 0.539***<br>(0.000) | 0.270***<br>(0.000) |
| Pos. 5                                           | 0.068<br>(0.390)  | -0.151<br>(0.054)  | 0.159*<br>(0.043) | 0.117<br>(0.137)   | 0.016<br>(0.834)  | 0.564***<br>(0.000) | 0.274***<br>(0.000) |
| Pos. 6                                           | 0.063<br>(0.422)  | -0.079<br>(0.317)  | 0.007<br>(0.927)  | 0.093<br>(0.237)   | 0.120<br>(0.126)  | 0.226***<br>(0.004) | 0.060<br>(0.445)    |
| Pos. 7                                           | 0.014<br>(0.860)  | -0.118<br>(0.134)  | 0.113<br>(0.152)  | 0.068<br>(0.387)   | -0.019<br>(0.807) | 0.557***<br>(0.000) | 0.225**<br>(0.004)  |
| Pos. 8                                           | 0.001<br>(0.990)  | -0.122<br>(0.121)  | 0.160*<br>(0.041) | 0.109<br>(0.167)   | -0.006<br>(0.944) | 0.595***<br>(0.000) | 0.261**<br>(0.001)  |
| Pos. 9                                           | 0.053<br>(0.498)  | -0.126<br>(0.108)  | 0.152<br>(0.053)  | 0.063<br>(0.424)   | 0.001<br>(0.986)  | 0.689***<br>(0.000) | 0.292**<br>(0.000)  |
| Pos. 10                                          | -0.050<br>(0.528) | -0.085<br>(0.280)  | 0.152<br>(0.053)  | 0.088<br>(0.265)   | 0.003<br>(0.973)  | 0.513***<br>(0.000) | 0.242**<br>(0.002)  |
| Pos. 11                                          | 0.018<br>(0.815)  | -0.162*<br>0.039   | 0.154*<br>(0.049) | 0.153<br>(0.051)   | 0.012<br>(0.883)  | 0.496***<br>(0.000) | 0.246**<br>(0.002)  |
| Pos. 12                                          | 0.010<br>(0.895)  | -0.063<br>(0.426)  | 0.122<br>(0.119)  | 0.040<br>(0.611)   | -0.033<br>(0.677) | 0.411***<br>0.000   | 0.191*<br>(0.015)   |
| Pos. 13                                          | 0.012<br>(0.879)  | -0.081<br>(0.304)  | 0.131<br>(0.097)  | 0.053<br>(0.500)   | -0.065<br>(0.407) | 0.445***<br>(0.000) | 0.173*<br>(0.027)   |
| Pos. 14                                          | 0.064<br>(0.462)  | 0.005<br>(0.955)   | -0.003<br>(0.977) | -0.119<br>(0.166)  | 0.020<br>(0.815)  | 0.217*<br>(0.011)   | 0.183*<br>(0.033)   |
| Pos. 15                                          | -0.085<br>(0.325) | 0.001<br>(0.987)   | 0.006<br>(0.941)  | 0.077<br>(0.373)   | -0.042<br>(0.631) | 0.187*<br>(0.029)   | 0.275**<br>(0.001)  |
| Pos. 16                                          | -0.073<br>(0.399) | 0.036<br>(0.679)   | 0.052<br>(0.550)  | 0.040<br>(0.641)   | 0.067<br>(0.442)  | 0.181*<br>(0.035)   | 0.241**<br>(0.005)  |
| Pos. 17                                          | 0.074<br>(0.392)  | 0.085<br>(0.322)   | -0.034<br>(0.697) | -0.092<br>(0.288)  | -0.070<br>(0.416) | 0.238**<br>(0.005)  | 0.175*<br>(0.042)   |
| Pos. 18                                          | 0.073<br>(0.401)  | 0.028<br>(0.749)   | 0.019<br>(0.828)  | -0.067<br>(0.442)  | -0.025<br>(0.769) | 0.282**<br>(0.001)  | 0.178*<br>(0.038)   |
| Pos. 19                                          | 0.047<br>(0.590)  | 0.090<br>(0.295)   | -0.021<br>(0.806) | -0.149<br>(0.084)  | 0.112<br>(0.194)  | 0.009<br>(0.918)    | 0.176*<br>(0.041)   |
| Pos. 20                                          | -0.036<br>(0.676) | 0.037<br>(0.672)   | -0.044<br>(0.609) | 0.022<br>(0.800)   | -0.001<br>(0.987) | 0.095<br>(0.269)    | 0.226**<br>(0.008)  |
| Pos. 21                                          | 0.016<br>(0.849)  | 0.133<br>(0.123)   | -0.009<br>(0.917) | -0.185*<br>(0.031) | 0.039<br>(0.649)  | 0.144<br>(0.094)    | 0.167<br>(0.052)    |
| Pos. 22                                          | 0.059<br>(0.491)  | -0.023<br>(0.786)  | 0.082<br>(0.345)  | -0.079<br>(0.358)  | 0.060<br>(0.489)  | 0.202*<br>(0.018)   | 0.194*<br>(0.024)   |
| Pos. 23                                          | 0.057<br>(0.513)  | 0.036<br>(0.674)   | 0.032<br>(0.715)  | -0.110<br>(0.202)  | 0.085<br>(0.323)  | 0.146<br>(0.089)    | 0.189*<br>(0.028)   |
| Pos. 24                                          | 0.051<br>(0.559)  | 0.060<br>(0.486)   | -0.025<br>(0.775) | -0.073<br>(0.399)  | 0.053<br>(0.537)  | 0.115<br>(0.181)    | 0.186*<br>(0.030)   |

|         |                   |                   |                   |                   |                   |                     |                    |
|---------|-------------------|-------------------|-------------------|-------------------|-------------------|---------------------|--------------------|
| Pos. 25 | 0.084<br>(0.330)  | 0.087<br>(0.312)  | -0.038<br>(0.664) | -0.155<br>(0.071) | 0.058<br>(0.500)  | 0.137<br>(0.111)    | 0.184*<br>(0.032)  |
| Pos. 26 | 0.058<br>(0.505)  | 0.057<br>(0.511)  | -0.042<br>(0.629) | -0.120<br>(0.164) | 0.049<br>(0.575)  | 0.146<br>(0.089)    | 0.201*<br>(0.019)  |
| Pos. 27 | 0.066<br>(0.445)  | 0.101<br>(0.244)  | -0.026<br>(0.767) | -0.139<br>(0.105) | 0.061<br>(0.478)  | 0.141<br>(0.103)    | 0.184*<br>(0.032)  |
| Pos. 28 | 0.050<br>(0.565)  | 0.081<br>(0.349)  | 0.009<br>(0.913)  | -0.092<br>(0.284) | 0.039<br>(0.653)  | 0.145<br>(0.093)    | 0.204*<br>(0.017)  |
| Pos. 29 | 0.062<br>(0.474)  | -0.071<br>(0.409) | 0.026<br>(0.767)  | -0.010<br>(0.911) | 0.072<br>(0.402)  | 0.313***<br>(0.000) | 0.295**<br>(0.000) |
| Pos. 30 | 0.067<br>(0.436)  | -0.016<br>(0.858) | -0.020<br>(0.821) | -0.053<br>(0.538) | 0.034<br>(0.693)  | 0.196*<br>(0.022)   | 0.243**<br>(0.004) |
| Pos. 31 | -0.003<br>(0.975) | -0.134<br>(0.120) | 0.202*<br>(0.018) | 0.113<br>(0.191)  | 0.005<br>(0.957)  | 0.484***<br>(0.000) | 0.208*<br>(0.015)  |
| Pos. 32 | 0.008<br>(0.918)  | -0.029<br>(0.718) | 0.015<br>(0.853)  | -0.010<br>(0.903) | 0.035<br>(0.661)  | 0.335***<br>(0.000) | 0.236**<br>(0.003) |
| Pos. 33 | 0.019<br>(0.813)  | 0.002<br>(0.975)  | -0.005<br>(0.953) | -0.028<br>(.723)  | 0.014<br>(0.857)  | 0.346**<br>(0.000)  | .234**<br>(0.003)  |
| Pos. 34 | 0.016<br>(0.841)  | -0.080<br>(0.315) | -0.009<br>(0.908) | 0.020<br>(0.800)  | 0.031<br>(0.696)  | 0.427**<br>(0.000)  | 0.290**<br>(0.000) |
| Pos. 35 | 0.079<br>(0.323)  | -0.075<br>(0.348) | 0.045<br>(0.575)  | -0.019<br>(0.815) | 0.037<br>(0.647)  | 0.384***<br>(0.000) | 0.222**<br>(0.005) |
| Pos. 36 | 0.053<br>(0.507)  | -0.020<br>(0.801) | 0.038<br>(0.633)  | -0.021<br>(0.792) | 0.045<br>(0.570)  | 0.363***<br>(0.000) | 0.260**<br>(0.001) |
| Pos. 37 | -0.041<br>(0.611) | -0.067<br>(0.401) | 0.023<br>(0.772)  | 0.033<br>(0.679)  | -0.011<br>(0.889) | 0.408**<br>(0.000)  | 0.279**<br>(0.000) |
| Pos. 38 | -0.030<br>(0.711) | -0.092<br>(0.247) | 0.066<br>(0.412)  | 0.074<br>(0.352)  | 0.037<br>(0.644)  | 0.462***<br>(0.000) | 0.315**<br>(0.000) |
| Pos. 39 | -0.027<br>(0.734) | -0.061<br>(0.447) | 0.060<br>(0.451)  | 0.013<br>(0.866)  | 0.067<br>(0.403)  | 0.359***<br>(0.000) | 0.226**<br>(0.004) |
| Pos. 40 | -0.080<br>(0.319) | -0.010<br>(0.904) | 0.038<br>(0.631)  | 0.001<br>(0.993)  | 0.040<br>(0.613)  | 0.221**<br>(0.005)  | 0.240**<br>(0.002) |
| Pos. 41 | -0.043<br>(0.591) | -0.072<br>(0.370) | 0.031<br>(0.699)  | 0.060<br>(0.455)  | -0.014<br>(0.865) | 0.338**<br>(0.000)  | 0.286**<br>(0.000) |
| Pos. 42 | 0.068<br>(0.397)  | -0.040<br>(0.614) | 0.048<br>(0.548)  | -0.060<br>(0.455) | 0.036<br>(0.651)  | 0.466***<br>(0.000) | 0.252**<br>(0.001) |
| Pos. 43 | 0.010<br>(0.902)  | -0.126<br>(0.113) | 0.080<br>(0.313)  | 0.019<br>(0.812)  | 0.057<br>(0.479)  | 0.383***<br>(0.000) | 0.236**<br>(0.003) |

**Table S2. Association of the HGK methylation frequencies with clinical parameters (univariate linear regression analyses).** The methylation frequencies from figure 4C and clinical results from all individuals (49 NGT and 114 T2D patients) were analyzed using Pearson correlation/univariate linear regression. BMI, body mass index. LDL, low-density lipoprotein. HbA1C, glycosylated hemoglobin levels. Waist, waist circumference. \*, P value < 0.05; \*\*, P value < 0.01; \*\*\*, P value < 0.001.

| Parameters             | Unstandardized coefficient (95% CI) | Standardized coefficient ( $\beta$ ) | P         |
|------------------------|-------------------------------------|--------------------------------------|-----------|
| Methylation at Pos. 6  | 6.99 (2.03 to 11.95)                | 0.213                                | 0.006**   |
| Age                    | 0.26 (-0.58 to 1.11)                | 0.049                                | 0.538     |
| Sex                    | -29.23 (-59.77 to 1.31)             | -0.167                               | 0.061     |
| BMI                    | 2.97 (-0.24 to 6.17)                | 0.141                                | 0.069     |
| Smoking                | -5.81 (-31.11 to 19.49)             | -0.041                               | 0.651     |
| Methylation at Pos. 11 | 51.36 (36.32 to 66.37)              | 0.477                                | <0.001*** |
| Age                    | 0.22 (-0.54 to -0.98)               | 0.040                                | 0.574     |
| Sex                    | -22.22 (-49.85 to 5.42)             | -0.127                               | 0.114     |
| BMI                    | 1.36 (-1.57 to 4.29)                | 0.065                                | 0.361     |
| Smoking                | -11.68 (-34.57 to 11.21)            | -0.082                               | 0.315     |
| Methylation at Pos. 12 | 26.69 (16.97 to 36.41)              | 0.391                                | 5.425     |
| Age                    | 0.29 (-0.50 to 1.08)                | 0.054                                | 0.470     |
| Sex                    | -27.19 (-55.91 to 1.54)             | -0.155                               | 0.063     |
| BMI                    | 2.02 (-1.02 to 5.06)                | 0.096                                | 0.191     |
| Smoking                | -4.80 (-28.52 to 18.92)             | -0.34                                | 0.70      |
| Methylation at Pos. 13 | 8.01 (5.35 to 10.66)                | 0.423                                | <0.001*** |
| Age                    | 0.28 (-0.50 to 1.06)                | 0.052                                | 0.480     |
| Sex                    | -25.86 (-54.15 to 2.43)             | -0.148                               | 0.073     |
| BMI                    | 1.85 (-1.14 to 4.85)                | 0.88                                 | 0.223     |
| Smoking                | -5.39 (-28.74 to 17.97)             | -0.038                               | 0.649     |
| Methylation at Pos. 14 | -0.65 (-4.50 to 3.19)               | -0.026                               | 0.737     |
| Age                    | 0.35 (-0.51 to 1.21)                | 0.065                                | 0.422     |
| Sex                    | -30.15 (-61.42 to 1.12)             | -1.72                                | 0.59      |
| BMI                    | 3.08 (-2.20 to 6.36)                | 0.147                                | 0.65      |
| Smoking                | -3.41 (-29.38 to 22.56)             | -0.024                               | 0.796     |
| Methylation at Pos. 15 | -0.12 (-2.48 to 2.24)               | -0.008                               | 0.919     |
| Age                    | 0.35 (-0.51 to 1.21)                | 0.065                                | 0.426     |
| Sex                    | -30.11 (-61.44 to 1.23)             | -0.172                               | 0.060     |
| BMI                    | 3.08 (-0.20 to 6.36)                | 0.147                                | 1.855     |
| Smoking                | -2.90 (-28.75 to 22.94)             | -0.20                                | 0.825     |
| Methylation at Pos. 16 | -0.51 (-2.87 to 1.86)               | -0.033                               | 0.674     |
| Age                    | 0.34 (-0.52 to 1.20)                | 0.063                                | 0.437     |
| Sex                    | -29.66 (-61.03 to 1.70)             | -0.169                               | 0.064     |
| BMI                    | 3.11 (-0.18 to 6.39)                | 0.148                                | 0.063     |
| Smoking                | -2.86 (-28.68 to 22.97)             | -0.20                                | 0.827     |
| Methylation at Pos. 17 | -0.09 (-2.08 to 1.91)               | -0.007                               | 0.933     |
| Age                    | 0.35 (-0.51 to 1.21)                | 0.66                                 | 0.419     |
| Sex                    | -30.09 (-61.49 to 1.30)             | -0.172                               | 0.060     |
| BMI                    | 3.08 (-0.20 to 6.36)                | 0.147                                | 0.066     |
| Smoking                | -3.00 (-28.87 to 22.87)             | -0.021                               | 0.819     |
| Methylation at Pos. 18 | -0.13 (-1.43 to 1.17)               | 0.015                                | 0.847     |
| Age                    | 0.35 (-0.51 to 1.21)                | 0.066                                | 0.420     |
| Sex                    | -30.04 (-61.36 to 1.28)             | -0.171                               | 0.060     |
| BMI                    | 3.09 (-0.19 to 6.37)                | 0.147                                | 0.065     |
| Smoking                | -3.07 (-28.93 to 22.79)             | -0.021                               | 0.815     |
| Methylation at Pos. 19 | -0.98 (-2.45 to 0.49)               | -0.103                               | 0.189     |
| Age                    | 0.35 (0.51 to 1.20)                 | 0.065                                | 0.422     |
| Sex                    | -29.06 (-60.21 to 2.10)             | -0.166                               | 0.067     |
| BMI                    | 3.04 (-0.22 to 6.31)                | 0.145                                | 0.068     |
| Smoking                | -4.80 (-30.64 to 21.05)             | -0.034                               | 0.714     |
| Methylation at Pos. 20 | -0.79 (-3.19 to 1.60)               | -0.051                               | 0.514     |
| Age                    | 0.34 (-0.52 to 1.20)                | 0.063                                | 0.440     |
| Sex                    | -29.46 (-60.78 to 1.86)             | -0.168                               | 0.065     |
| BMI                    | 3.05 (-2.3 to 6.33)                 | 0.145                                | 0.068     |
| Smoking                | -2.89 (-28.69 to 22.90)             | -0.20                                | 0.825     |
| Methylation at Pos. 21 | -0.174 (-1.35 to 1.01)              | -0.023                               | 0.771     |

|                        |                          |        |           |
|------------------------|--------------------------|--------|-----------|
| Age                    | 0.35 (-0.51 to 1.21)     | 0.65   | 0.426     |
| Sex                    | -29.84 (-61.21 to 1.52)  | -0.170 | 0.062     |
| BMI                    | 3.08 (-0.21 to 6.36)     | 0.146  | 0.066     |
| Smoking                | -3.41 (-29.43 to 22.61)  | -0.024 | 0.796     |
| Methylation at Pos. 22 | -0.28 (-1.83 to 1.27)    | -0.028 | 0.718     |
| Age                    | 0.352 (-0.51 to 1.21)    | 0.66   | 0.420     |
| Sex                    | -30.19 (-61.46 to 1.072) | -0.172 | 0.058     |
| BMI                    | 3.12 (-0.17 to 6.40)     | 0.148  | -0.063    |
| Smoking                | -3.33 (-29.24 to 22.58)  | -0.023 | 0.800     |
| Methylation at Pos. 23 | -0.36 (-1.42 to 0.70)    | -0.053 | 0.502     |
| Age                    | 0.35 (-0.51 to 1.21)     | 0.065  | 0.420     |
| Sex                    | -29.82 (-61.07 to 1.43)  | -0.170 | 0.061     |
| BMI                    | 3.11 (-0.17 to 6.39)     | 0.148  | 0.063     |
| Smoking                | -3.70 (-29.60 to 22.19)  | -0.26  | 0.778     |
| Methylation at Pos. 24 | -0.79 (-2.82 to 1.25)    | -0.060 | 0.447     |
| Age                    | 0.35 (-0.51 to 1.21)     | 0.066  | 0.420     |
| Sex                    | -29.39 (-60.68 to 1.90)  | -0.168 | 0.065     |
| BMI                    | 3.07 (-0.21 to 6.34)     | 0.146  | 0.66      |
| Smoking                | -3.45 (-29.27 to 22.37)  | -0.024 | 0.792     |
| Methylation at Pos. 25 | -0.75 (-2.58 to 1.08)    | -0.064 | 0.420     |
| Age                    | 0.35 (-0.51 to 1.21)     | 0.066  | 0.417     |
| Sex                    | -29.40 (-60.67 to 1.88)  | -0.168 | 0.065     |
| BMI                    | 3.05 (-0.22 to 6.33)     | 0.145  | 0.068     |
| Smoking                | -4.02 (-29.93 to 21.89)  | -0.028 | 0.760     |
| Methylation at Pos. 26 | -0.67 (-2.47 to 1.14)    | -0.057 | 0.468     |
| Age                    | 0.35 (-0.51 to 1.21)     | 0.065  | .425      |
| Sex                    | -29.65 (-60.91 to 1.61)  | -0.169 | 0.063     |
| BMI                    | 3.05 (-0.23 to 6.33)     | 0.145  | 0.068     |
| Smoking                | -3.81 (-29.70 to 22.09)  | -0.027 | 0.772     |
| Methylation at Pos. 27 | -0.64 (-2.54 to 1.26)    | -0.052 | 0.507     |
| Age                    | 0.35 (-0.51 to 1.21)     | 0.066  | 0.419     |
| Sex                    | -29.39 (-60.71 to .194)  | -0.168 | 0.066     |
| BMI                    | 3.07 (-0.21 to 6.34)     | 0.146  | 0.066     |
| Smoking                | -3.70 (-29.59 to 22.20)  | -0.026 | 0.778     |
| Methylation at Pos.28  | -1.20 (-3.59 to 1.21)    | -0.077 | 0.328     |
| Age                    | 0.35 (-0.51 to 1.21)     | 0.065  | 0.423     |
| Sex                    | -28.94 (-60.23 to 2.34)  | -0.165 | 0.070     |
| BMI                    | 3.10 (-0.17 to 6.37)     | 0.148  | 0.063     |
| Smoking                | -3.65 (-29.45 to 22.14)  | -0.026 | 0.780     |
| Methylation at Pos. 29 | 0.83 (-1.86 to 3.51)     | 0.047  | 0.544     |
| Age                    | 0.35 (-0.51 to 1.21)     | 0.066  | 0.419     |
| Sex                    | -30.12 (-61.36 to 1.13)  | -0.172 | 0.059     |
| BMI                    | 3.06 (-0.22 to 6.34)     | 0.146  | 0.067     |
| Smoking                | -2.56 (-28.39 to 23.28)  | -0.018 | 0.845     |
| Methylation at Pos.30  | 0.10 (-3.00 to 3.20)     | 0.005  | 0.950     |
| Age                    | 0.35 (-0.51 to 1.21)     | 0.066  | 0.420     |
| Sex                    | -30.22 (-61.50 to 1.06)  | -0.172 | 0.058     |
| BMI                    | 3.08 (-0.20 to 6.36)     | 0.147  | 0.065     |
| Smoking                | -2.89 (-28.78 to 23.00)  | -0.020 | 0.826     |
| Methylation at Pos.31  | 2.29 (-0.11 to 4.68)     | 0.147  | 0.061     |
| Age                    | 0.36 (-0.49 to 1.21)     | 0.068  | 0.400     |
| Sex                    | -29.88 (-60.81 to 1.05)  | -0.171 | 0.058     |
| BMI                    | 2.63 (-0.65 to 5.91)     | 0.125  | 0.116     |
| Smoking                | -3.66 (-29.21 to 21.90)  | -0.026 | 0.778     |
| Methylation at Pos.32  | 3.48 (1.77 to 5.18)      | 0.298  | <0.001*** |
| Age                    | 0.40 (-0.42 to 1.22)     | 0.074  | 0.341     |
| Sex                    | -29.06 (-58.84 to 0.72)  | -0.166 | 0.056     |
| BMI                    | 2.86 (-0.27 to 5.98)     | 0.136  | 0.073     |
| Smoking                | -1.33 (-25.93 to 23.28)  | -0.009 | 0.915     |

|                       |                          |        |           |
|-----------------------|--------------------------|--------|-----------|
| Methylation at Pos.33 | 4.27 (2.30 to 6.23)      | 0.316  | <0.001*** |
| Age                   | 0.38 (-0.43 to 1.20)     | 0.071  | 0.355     |
| Sex                   | -30.58 (-60.17 to -0.99) | -0.175 | 0.043*    |
| BMI                   | 2.96 (-0.15 to 6.06)     | 0.141  | 0.062     |
| Smoking               | -1.08 (-25.53 to 23.38)  | -0.008 | 0.931     |
| Methylation at Pos.34 | 5.41 (3.39 to 7.43)      | 0.379  | <0.001*** |
| Age                   | 0.41 (-0.39 to 1.20)     | 0.076  | 0.311     |
| Sex                   | -25.68 (-54.54 to 3.18)  | -0.147 | 0.081     |
| BMI                   | 2.97 (-0.05 to 6.00)     | 0.142  | 0.054     |
| Smoking               | -1.12 (-24.92 to 22.69)  | -0.008 | 0.93      |
| Methylation at Pos.35 | 4.54 (2.54 to 6.54)      | 0.330  | <0.001*** |
| Age                   | 0.29 (-0.52 to 1.10)     | 0.054  | 0.485     |
| Sex                   | -26.29 (-55.79 to 3.20)  | -0.150 | 0.080     |
| BMI                   | 2.58 (-0.52 to 5.68)     | 0.123  | 0.102     |
| Smoking               | -0.30 (-24.64 to 24.05)  | -0.002 | 0.981     |
| Methylation at Pos.36 | 6.15 (3.36 to 8.93)      | 0.321  | <0.001*** |
| Age                   | 0.32 (-0.50 to 1.13)     | 0.059  | 0.443     |
| Sex                   | -29.88 (-59.42 to -0.34) | -0.171 | 0.047*    |
| BMI                   | 2.64 (-0.47 to 5.75)     | 0.126  | 0.095     |
| Smoking               | -1.50 (-25.91 to 22.91)  | -0.010 | 0.904     |
| Methylation at Pos.37 | 4.37 (2.65 to 6.08)      | 0.364  | <0.001*** |
| Age                   | 0.50 (-0.30 to 1.30)     | 0.093  | 0.222     |
| Sex                   | -26.82 (-55.88 to 2.23)  | -0.153 | 0.070     |
| BMI                   | 2.79 (-0.26 to 5.83)     | 0.133  | 0.073     |
| Smoking               | -1.92 (-25.90 to 22.06)  | -0.013 | 0.875     |
| Methylation at Pos.38 | 7.37 (4.77 to 9.96)      | 0.401  | <0.001*** |
| Age                   | 0.47 (-0.32 to 1.25)     | 0.087  | 0.243     |
| Sex                   | -26.74 (-55.31 to 1.84)  | -0.153 | 0.066     |
| BMI                   | 2.35 (-0.66 to 5.35)     | 0.112  | 0.125     |
| Smoking               | -4.33 (-27.91 to 19.26)  | -0.030 | 0.718     |
| Methylation at Pos.39 | 6.50 (3.39 to 9.60)      | 0.307  | 4.133     |
| Age                   | 0.45 (-0.37 to 1.27)     | 0.085  | 0.275     |
| Sex                   | -27.66 (-57.39 to 2.07)  | -0.158 | 0.068     |
| BMI                   | 2.58 (-0.54 to 5.71)     | 0.123  | 0.105     |
| Smoking               | -1.48 (-26.03 to 23.06)  | -0.010 | 0.905     |
| Methylation at Pos.40 | 3.58 (0.90 to 6.26)      | 0.202  | 0.009**   |
| Age                   | 0.47 (-0.38 to 1.31)     | 0.087  | 0.279     |
| Sex                   | -29.84 (-60.45 to 0.77)  | -0.170 | 0.056     |
| BMI                   | 2.89 (-0.33 to 6.10)     | 0.138  | 0.078     |
| Smoking               | -2.02 (-27.31 to 23.27)  | -0.014 | 0.875     |
| Methylation at Pos.41 | 4.00 (1.98 to 6.02)      | 0.292  | <0.001*** |
| Age                   | 0.47 (-0.36 to 1.29)     | 0.087  | 0.267     |
| Sex                   | -28.26 (-58.13 to 1.61)  | -0.161 | 0.064     |
| BMI                   | 2.76 (-0.37 to 5.90)     | 0.132  | 0.084     |
| Smoking               | -3.38 (-28.04 to 21.28)  | -0.024 | 0.787     |
| Methylation at Pos.42 | 3.30 (2.19 to 4.41)      | 0.415  | <0.001*** |
| Age                   | 0.30 (-0.48 to 1.08)     | 0.056  | 0.448     |
| Sex                   | -26.36 (-54.72 to 2.00)  | -0.150 | 0.068     |
| BMI                   | 2.47 (-0.51 to 5.45)     | 0.118  | 0.104     |
| Smoking               | 2.35 (-21.12 to 25.82)   | 0.016  | 0.844     |
| Methylation at Pos.43 | 3.04 (1.68 to 4.41)      | 0.326  | <0.001*** |
| Age                   | 0.40 (-0.41 to 1.21)     | 0.075  | 0.330     |
| Sex                   | -23.21 (-52.89 to 6.47)  | -0.132 | 0.124     |
| BMI                   | 2.43 (-0.68 to 5.54)     | 0.116  | 0.125     |
| Smoking               | -0.41 (-24.81 to 23.99)  | -0.003 | 0.973     |

**Table S3. Multivariate linear regression analyses for the estimated risk of high OGTT glucose levels.** The methylation frequencies and clinical results from 163

individuals (49 NGT and 114 T2D patients) were analyzed using multivariate linear regression analyses. Data are presented as standardized regression coefficient,  $\beta$ , and unstandardized coefficient, B (95% CI). BMI, body mass index. \*,  $P$  value < 0.05; \*\*,  $P$  value < 0.01; \*\*\*,  $P$  value < 0.001.
